# Supplementary material for: Intercalation phenomena in two-dimensional hybrid perovskites featuring discrete free volume elements
Source: Royal Society of Chemistry journal article supplement (doi:10.1039/d5qm00488h), 2025-12-02
Supplement: d5qm00488h1.pdf [file d5qm00488h1.pdf]

# Supporting Information

## for

# Intercalation Phenomena in Two-Dimensional Hybrid Perovskites Featuring Discrete Free Volume Elements

*Kevin Whitham<sup>1</sup>, Jisook Hong<sup>1</sup>, Guangzhao Chen<sup>1</sup>, Liang Z. Tan<sup>1,\*</sup> & Brett A. Helms<sup>1,2\*</sup>*

<sup>1</sup>The Molecular Foundry, Lawrence Berkeley National Laboratory, Berkeley, CA 94720, USA

<sup>2</sup>Materials Sciences Division, Lawrence Berkeley National Laboratory, Berkeley, CA 94720,  
USA

Correspondence to: [bahelms@lbl.gov](mailto:bahelms@lbl.gov), [lztan@lbl.gov](mailto:lztan@lbl.gov)

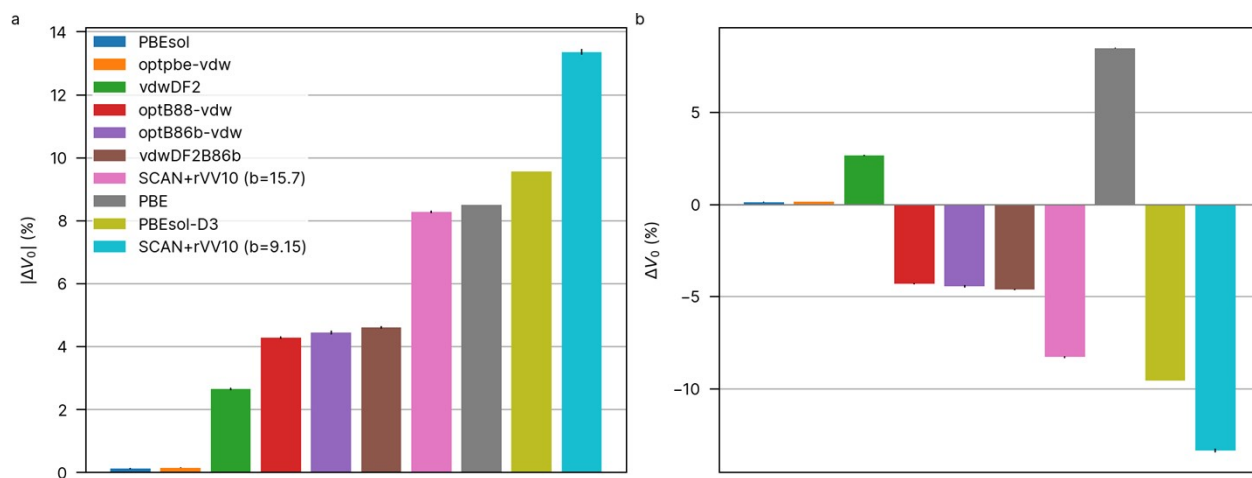

**Figure S1.** (a) Absolute and (b) relative difference between experimental and relaxed unit cell volume of ((3-(naphthalen-1-yloxy)propan-1-aminium)<sub>2</sub>PbI<sub>4</sub>) calculated using different DFT functionals.

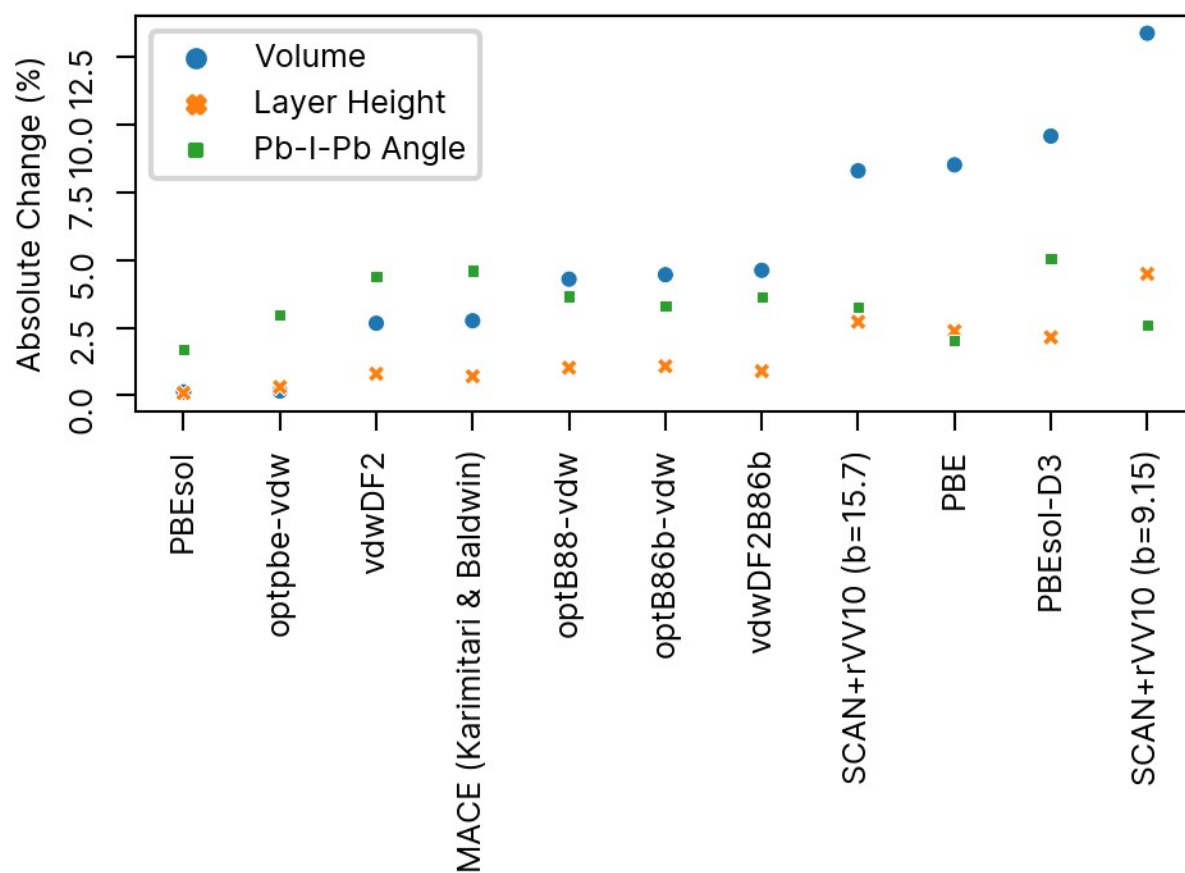

**Figure S2.** Absolute differences in relaxed unit cell volume, layer height, and Pb-I-Pb angle, relative to experimental data, across different DFT exchange-correlation functions.

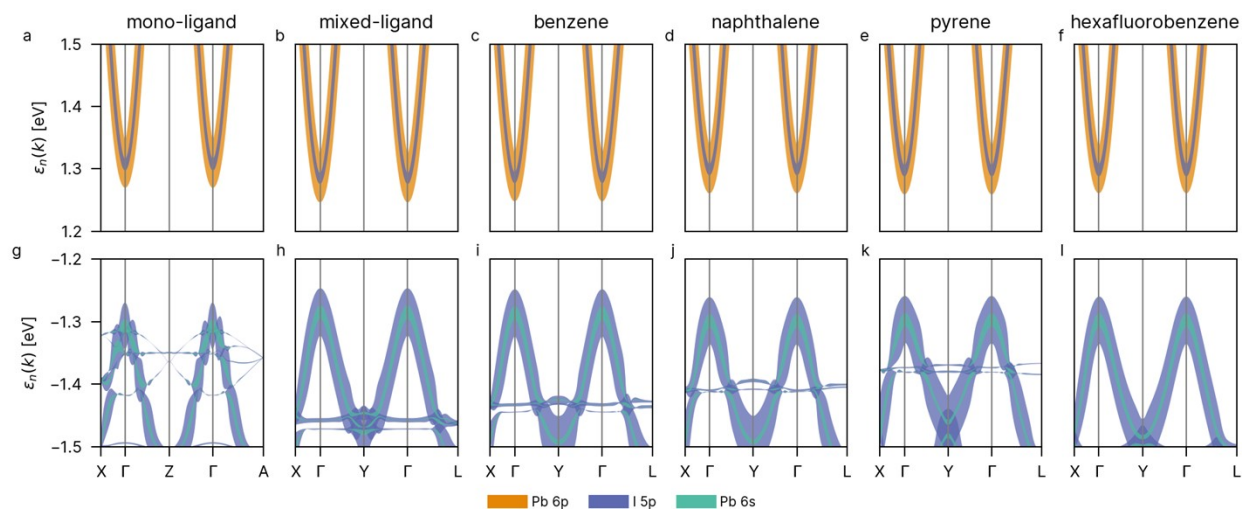

**Figure S3.** (a–f) Conduction bands and (g–l) valence bands of all structures. (a,g) ((3-(naphthalen-1-yloxy)propan-1-aminium)<sub>2</sub>PbI<sub>4</sub>. (b,h) ((3-(naphthalen-1-yloxy)propan-1-aminium)(propan-1-amminium)PbI<sub>4</sub> without intercalation and (c,i) with benzene (d,j) with naphthalene (e,k) with pyrene (f,l) with hexafluorobenzene. Only contributions from Pb 6s,p and I 5p are shown. Line thickness is proportional to the contribution from the atomic orbital. The thin lines near the top of the valence band are states on pi systems of the ligands and intercalant molecules.

**Table S1.** Calculated total energies and formation energies with guest molecules. Here, the total energy of (NOP)(PA)PbI<sub>4</sub> is given for a unit cell with 2 formula units of PbI<sub>4</sub> , while the total energy of the rest of the compounds is given for a unit cell with 4 formula units of PbI<sub>4</sub>.

| <b>Material</b>                             | <b>Total Energy (eV)</b> | <b>Formation Energy (eV)</b> |
|---------------------------------------------|--------------------------|------------------------------|
| (NOP)(PA)PbI <sub>4</sub>                   | −478.47                  |                              |
| (NOP)(PA)PbI <sub>4</sub> benzene           | −1025.11                 | −0.91                        |
| (NOP)(PA)PbI <sub>4</sub> hexafluorobenzene | −1013.04                 | −1.17                        |
| (NOP)(PA)PbI <sub>4</sub> naphthalene       | −1063.16                 | −1.15                        |
| (NOP)(PA)PbI <sub>4</sub> pyrene            | −1116.92                 | −1.46                        |

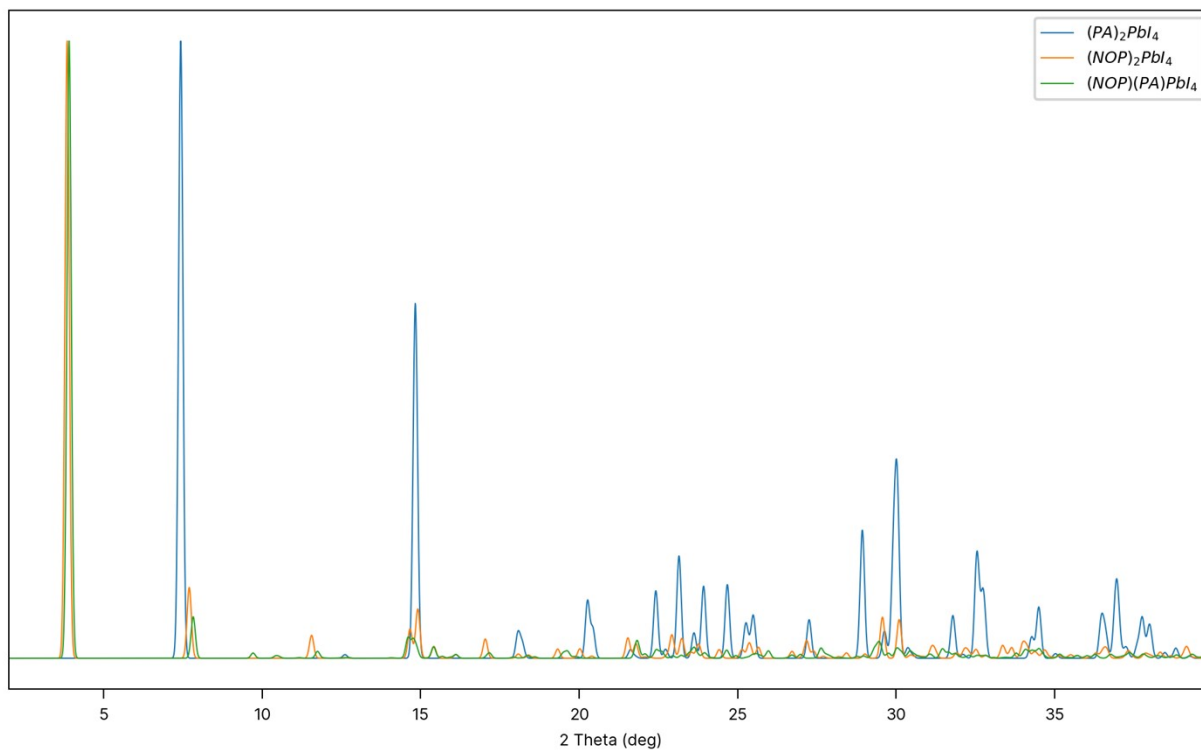

**Figure S4.** X-ray diffraction calculated using a wavelength of 0.15406 nm (Cu  $K\alpha_1$ ). Peak broadening was added using the Scherrer equation with a grain size of 50 nm. Instrumental broadening was ignored.
